# Supplementary material for: Point Prevalence Survey of Antibiotic Use across 13 Hospitals in Uganda
Source: MDPI journal article supplement (doi:10.3390/antibiotics11020199), 2022-02-04
Supplement: s1 [file s1]

Table S1. Hospital characteristics

| Hospital                 | Total beds | Ownership              | Annual admissions | Included patients |
|--------------------------|------------|------------------------|-------------------|-------------------|
| Gulu RRH                 | 347        | Public                 | 17,888            | 133               |
| Hoima RRH                | 317        | Public                 | 17,455            | 103               |
| Kagando                  | 231        | Private not-for-profit | 12,168            | 61                |
| Kiwoko                   | 204        | Private not-for-profit | 9,810             | 43                |
| Kumi                     | 330        | Private not-for-profit | 4,642             | 47                |
| Lacor                    | 524        | Private not-for-profit | 16,839            | 168               |
| Lira RRH                 | 401        | Public                 | 13,421            | 119               |
| Masaka RRH               | 333        | Public                 | 24,547            | 127               |
| Moroto RRH               | 181        | Public                 | 7,864             | 99                |
| Ruharo Mission           | 78         | Private not-for-profit | 2,870             | 6                 |
| Soroti RRH               | 251        | Public                 | 13,115            | 125               |
| St. Anthony              | 93         | Private not-for-profit | 1,500             | 12                |
| St. Francis<br>Naggalama | 100        | Private not-for-profit | 5,053             | 34                |

Table S2. Compliance with Uganda Clinical Treatment Guidelines by antibiotic

| Antibiotic             | Guideline compliance (n, %) |
|------------------------|-----------------------------|
| Amoxicillin            | 8 (30.8%)                   |
| Amoxyclav              | 47 (52.8%)                  |
| Ampicillin             | 2 (2.5%)                    |
| Ampicillin-cloxacillin | 7 (36.8%)                   |
| Azithromycin           | 1 (20%)                     |
| Cef-sulbactam          | 0 (0%)                      |
| Cefazolin              | 1 (25%)                     |
| Cefixime               | 0 (0%)                      |
| Cefotaxime             | 0 (0%)                      |
| Ceftazidime            | 167 (32.6%)                 |
| Ceftriaxone            | 13 (28.9%)                  |
| Ciprofloxacin          | 0 (0%)                      |
| Clindamycin            | 13 (48.1%)                  |
| Cloxacillin            | 0 (0%)                      |
| Co-trimoxazole         | 1 (33.3%)                   |
| Doxycycline            | 1 (14.3%)                   |
| Erythromycin           | 53 (44.5%)                  |
| Flucamox               | 3 (20%)                     |
| Gentamicin             | 1 (25%)                     |
| Levofloxacin           | 86 (22.6%)                  |
| Meropenem              | 4 (40%)                     |

|                         |            |
|-------------------------|------------|
| Metronidazole           | 10 (62.5%) |
| Nitrofurantoin          | 0 (0%)     |
| Penicillin              | 0 (0%)     |
| Piperacillin-tazobactam | 0 (0%)     |
| Secnidazole             | 1 (100%)   |
| Sulbactam               | 3 (100%)   |
| Tinidazole              | 1 (100%)   |

Table S3. Adherence by hospital and antibiotic

| <b>Percentage of prescribed antibiotic doses not administered to patients (N, %)</b>                                                                                              |            |
|-----------------------------------------------------------------------------------------------------------------------------------------------------------------------------------|------------|
| <b>Hospital</b>                                                                                                                                                                   |            |
| Gulu RRH                                                                                                                                                                          | 31 (21.4%) |
| Hoima RRH                                                                                                                                                                         | 0 (0%)     |
| Kagando                                                                                                                                                                           | 0 (0%)     |
| Kiwoko                                                                                                                                                                            | 0 (0%)     |
| Kumi                                                                                                                                                                              | 0 (0%)     |
| Lacor                                                                                                                                                                             | 2 (1.3%)   |
| Lira RRH                                                                                                                                                                          | 52 (30.6%) |
| Masaka RRH                                                                                                                                                                        | 15 (7.2%)  |
| Moroto RRH                                                                                                                                                                        | 10 (8.8%)  |
| Ruharo Mission                                                                                                                                                                    | 0 (0%)     |
| Soroti RRH                                                                                                                                                                        | 14 (8.9%)  |
| St. Anthony                                                                                                                                                                       | 2 (10.5%)  |
| St. Francis Naggalama                                                                                                                                                             | 0 (0%)     |
| <b>Antibiotic</b>                                                                                                                                                                 |            |
| Ampicillin                                                                                                                                                                        | 6 (6.7%)   |
| Ampicillin-cloxacillin                                                                                                                                                            | 24 (30.4%) |
| Ceftriaxone                                                                                                                                                                       | 25 (4.9%)  |
| Ciprofloxacin                                                                                                                                                                     | 4 (8.9%)   |
| Cloxacillin                                                                                                                                                                       | 1 (3.7%)   |
| Co-trimoxazole                                                                                                                                                                    | 1 (33.3%)  |
| Gentamicin                                                                                                                                                                        | 7 (5.9%)   |
| Metronidazole                                                                                                                                                                     | 57 (15%)   |
| Nitrofurantoin                                                                                                                                                                    | 0 (0%)     |
| Penicillin                                                                                                                                                                        | 1 (6.3%)   |
| Other <sup>a</sup>                                                                                                                                                                | 0 (0%)     |
| <sup>a</sup> Other includes: Amoxicillin, amoxycylav, azithromycin, cef-sulbactam cefazolin, cefixime, cefotaxime, ceftazidime, clindamycin, doxycycline, erythromycin, flucamox, |            |

levofloxacin, meropenem, nitrofurantoin, piperacillin-tazobactam, secnidazole, sulbactam, and tinidazole  
Abbreviations: RRH = regional referral hospital

Table S4. Associations of antibiotic use with characteristics of females in the study sample

| Variable               | Antibiotic use (n [%]) | Odds ratio    | p-value <sup>1</sup> |
|------------------------|------------------------|---------------|----------------------|
| Age category           |                        |               |                      |
| <2 yrs                 | 42 (82.9%)             | 1 (reference) |                      |
| 2-50 yrs               | 332 (75.8%)            | 0.58          | 0.19                 |
| >50 yrs                | 47 (71.7%)             | 0.64          | 0.19                 |
| Hospital ownership     |                        |               |                      |
| Private not-for-profit | 120 (62.8%)            | 1 (reference) |                      |
| Public                 | 305 (73.0%)            | 1.60          | <0.01*               |
| Hospital               |                        |               |                      |
| Gulu RRH               | 51 (59.3%)             | 1 (reference) |                      |
| Hoima RRH              | 58 (86.6%)             | 4.42          | 0.09                 |
| Kagando                | 31 (83.8%)             | 3.55          | <0.001*              |
| Kiwoko                 | 8 (36.4%)              | 0.39          | 0.01*                |
| Kumi                   | 16 (88.9%)             | 5.49          | 0.03*                |
| Lacor                  | 36 (44.4%)             | 0.55          | 0.06                 |
| Lira RRH               | 43 (66.2%)             | 1.34          | 0.39                 |
| Masaka RRH             | 68 (87.2%)             | 4.67          | <0.001*              |
| Moroto RRH             | 36 (72.0%)             | 1.76          | 0.14                 |
| Ruharo Mission         | 4 (80.0%)              | 2.75          | 0.38                 |
| Soroti RRH             | 49 (68.1%)             | 1.46          | 0.26                 |
| St. Anthony            | 8 (88.9%)              | 5.49          | 0.12                 |
| St. Francis Naggalama  | 17 (89.5%)             | 5.83          | 0.02*                |
| Ward                   |                        |               |                      |
| Maternal               | 210 (70.4%)            | 1 (reference) |                      |
| Medical                | 67 (71.1%)             | 0.80          | 0.35                 |
| Paediatric             | 75 (77.4%)             | 1.46          | 0.17                 |
| Surgical               | 73 (76.4%)             | 0.87          | 0.56                 |
| Underlying conditions  |                        |               |                      |
| HIV (no)               | 372 (67.5%)            | 1 (reference) |                      |
| HIV (yes)              | 19 (90.5%)             | 4.57          | 0.04*                |
| TB (no)                | 384 (68.0%)            | 1 (reference) |                      |
| TB (yes)               | 6 (85.7%)              | 2.83          | 0.33                 |
| Malaria (no)           | 355 (68.1%)            | 1 (reference) |                      |
| Malaria (yes)          | 44 (73.3%)             | 1.29          | 0.41                 |
| COPD (no)              | 403 (69.6%)            | 1 (reference) |                      |

|                                                                                                                                                                                                                                                          |             |               |       |
|----------------------------------------------------------------------------------------------------------------------------------------------------------------------------------------------------------------------------------------------------------|-------------|---------------|-------|
| COPD (yes)                                                                                                                                                                                                                                               | 3 (60.0%)   | 0.66          | 0.65  |
| Malnutrition (no)                                                                                                                                                                                                                                        | 397 (68.8%) | 1 (reference) |       |
| Malnutrition (yes)                                                                                                                                                                                                                                       | 23 (92.0%)  | 5.21          | 0.03* |
| Hosp in past 90 days (no)                                                                                                                                                                                                                                | 363 (67.8%) | 1 (reference) |       |
| Hosp in past 90 days (yes)                                                                                                                                                                                                                               | 40 (50.0%)  | 1.90          | 0.08  |
| <sup>1</sup> Statistical significance is noted by an "*" for all relationships with $p < 0.05$ .<br>Abbreviations: RRH = regional referral hospital; COPD = chronic obstructive pulmonary disease; HIV = Human immunodeficiency virus; TB = tuberculosis |             |               |       |

Table S5. Associations of antibiotic use with characteristics of males in the study sample

| Variable               | Antibiotic use (n [%]) | Odds ratio    | p-value <sup>1</sup> |
|------------------------|------------------------|---------------|----------------------|
| Age category           |                        |               |                      |
| <2 yrs                 | 60 (87.0%)             | 1 (reference) |                      |
| 2-50 yrs               | 237 (75.7%)            | 0.47          | 0.04*                |
| >50 yrs                | 70 (83.3%)             | 0.75          | 0.53                 |
| Hospital ownership     |                        |               |                      |
| Private not-for-profit | 125 (69.4%)            | 1 (reference) |                      |
| Public                 | 244 (84.7%)            | 2.44          | <0.001*              |
| Hospital               |                        |               |                      |
| Gulu RRH               | 33 (70.2%)             | 1 (reference) |                      |
| Hoima RRH              | 30 (83.3%)             | 2.12          | 0.17                 |
| Kagando                | 18 (75.0%)             | 1.27          | 0.67                 |
| Kiwoko                 | 16 (76.2%)             | 1.36          | 0.61                 |
| Kumi                   | 22 (75.9%)             | 1.71          | 0.59                 |
| Lacor                  | 50 (57.5%)             | 0.57          | 0.04*                |
| Lira RRH               | 43 (79.6%)             | 1.66          | 0.12                 |
| Masaka RRH             | 46 (93.9%)             | 6.51          | <0.001*              |
| Moroto RRH             | 45 (91.8%)             | 4.77          | 0.01*                |
| Ruharo Mission         | 1 (100%)               | NA            | NA                   |
| Soroti RRH             | 47 (88.7%)             | 3.32          | 0.03*                |
| St. Anthony            | 3 (100%)               | NA            | NA                   |
| St. Francis Naggalama  | 15 (100%)              | NA            | NA                   |
| Ward                   |                        |               |                      |
| Maternal               | 9 (81.8%)              | 1 (reference) |                      |
| Medical                | 103 (75.7%)            | 1.03          | 0.65                 |
| Paediatric             | 113 (77.4%)            | 2.24          | 0.73                 |
| Surgical               | 144 (82.3%)            | 1.24          | 0.97                 |
| Underlying conditions  |                        |               |                      |
| HIV (no)               | 317 (77.3%)            | 1 (reference) |                      |
| HIV (yes)              | 24 (96.0%)             | 7.04          | 0.06                 |

|                                                                                                                                                                                                                                                          |             |               |      |
|----------------------------------------------------------------------------------------------------------------------------------------------------------------------------------------------------------------------------------------------------------|-------------|---------------|------|
| TB (no)                                                                                                                                                                                                                                                  | 321 (77.3%) | 1 (reference) |      |
| TB (yes)                                                                                                                                                                                                                                                 | 12 (92.3%)  | 3.51          | 0.23 |
| Malaria (no)                                                                                                                                                                                                                                             | 312 (80.0%) | 1 (reference) |      |
| Malaria (yes)                                                                                                                                                                                                                                            | 41 (70.7%)  | 0.60          | 0.11 |
| COPD (no)                                                                                                                                                                                                                                                | 349 (79.7%) | 1 (reference) |      |
| COPD (yes)                                                                                                                                                                                                                                               | 6 (85.7%)   | 1.53          | 0.70 |
| Malnutrition (no)                                                                                                                                                                                                                                        | 341 (78.4%) | 1 (reference) |      |
| Malnutrition (yes)                                                                                                                                                                                                                                       | 26 (96.2%)  | 7.17          | 0.05 |
| Hosp in past 90 days (no)                                                                                                                                                                                                                                | 333 (79.3%) | 1 (reference) |      |
| Hosp in past 90 days (yes)                                                                                                                                                                                                                               | 25 (80.6%)  | 1.09          | 0.86 |
| <sup>1</sup> Statistical significance is noted by an “*” for all relationships with $p < 0.05$ .<br>Abbreviations: RRH = regional referral hospital; COPD = chronic obstructive pulmonary disease; HIV = Human immunodeficiency virus; TB = tuberculosis |             |               |      |
